# Supplementary material for: Soilless Cultivated Halophyte Plants: Volatile, Nutritional, Phytochemical, and Biological Differences
Source: MDPI journal article supplement (doi:10.3390/antiox12061161), 2023-05-26
Supplement: s1 [file s1]

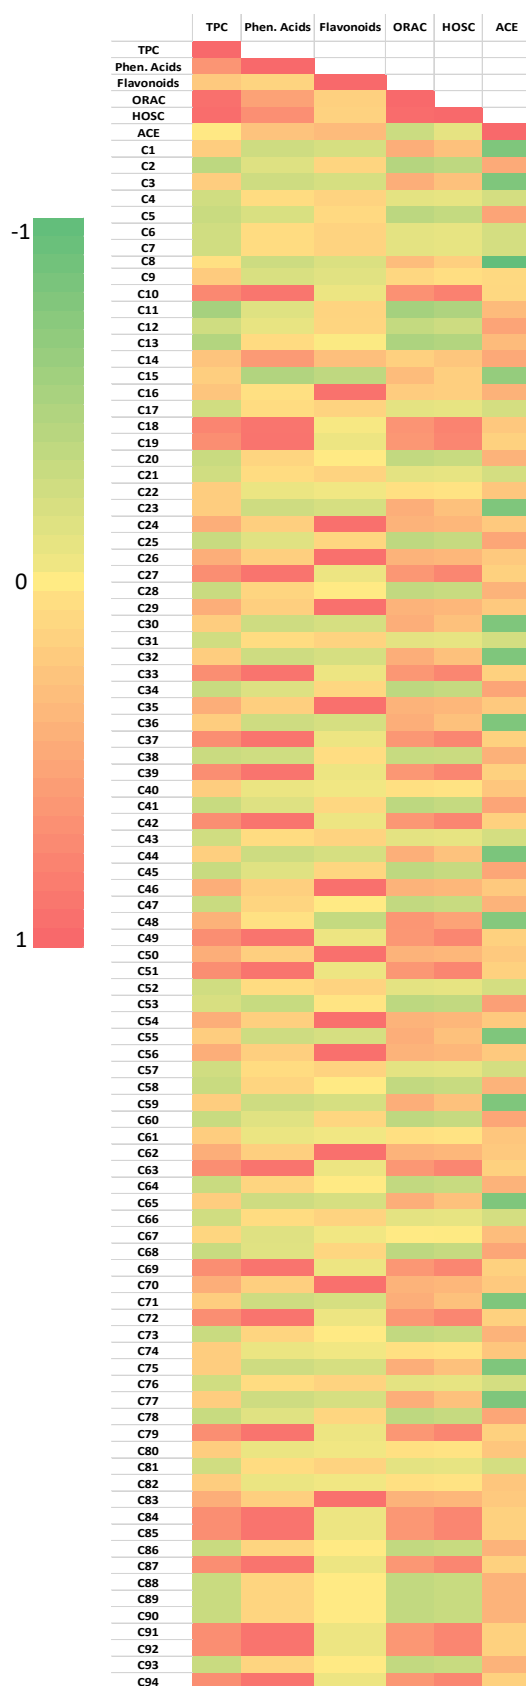

**Figure S1.** Correlation matrix (Pearson's R values from -1 to 1) between the phenolic composition and the bioactivity measured by *in vitro* antioxidant and anti-hypertensive activities. ACE inhibition expressed as inverse values for the anti-hypertensive activity.

**Table S1.** Individual phenolic compounds quantified in the different halophyte species. Results expressed as mean  $\pm$  standard deviation (n = 2),  $\mu\text{g/g}$  of fresh weight (FW). The hydroxycinnamic acids (HCA) and their derivatives were quantified as a 3-O-caffeoylquinic acid equivalent (CQAE), flavonoids were quantified as quercetin-3-glucoside equivalent (QGE) and hydroxybenzoic acids (HBA) were quantified as a gallic acid equivalent (GAE). \* Phenolic compound identified with standard.

| Class | Peak | Phenolic Compounds<br>$\mu\text{g/g}$ FW  | <i>I. crithmoides</i> | <i>S. fruticosa</i> | <i>S. ramosissima</i> | <i>D. crassifolium</i> | <i>C. maritimum</i> | <i>M. nodiflorum</i> | <i>M. crystallinum</i> |
|-------|------|-------------------------------------------|-----------------------|---------------------|-----------------------|------------------------|---------------------|----------------------|------------------------|
| HCA   | 1    | <i>p</i> -Coumaric acid derivative        | ND                    | 0.370 $\pm$ 0.003   | ND                    | ND                     | ND                  | ND                   | ND                     |
|       | 5    | 5-O-Caffeoylquinic acid                   | ND                    | 0.680 $\pm$ 0.003   | 4.253 $\pm$ 0.033     | ND                     | ND                  | ND                   | ND                     |
|       | 8    | Caffeic acid derivative                   | 0.482 $\pm$ 0.004     | 1.138 $\pm$ 0.028   | ND                    | ND                     | ND                  | ND                   | ND                     |
|       | 11   | Caffeic acid-O-glucoside                  | 0.356 $\pm$ 0.001     | ND                  | ND                    | ND                     | 0.744 $\pm$ 0.028   | ND                   | ND                     |
|       | 12   | <i>p</i> -Coumaric acid-O-glucoside       | ND                    | ND                  | ND                    | ND                     | 10.495 $\pm$ 0.127  | 0.482 $\pm$ 0.008    | 0.247 $\pm$ 0.095      |
|       | 13   | <i>p</i> -Coumaric acid                   | 2.868 $\pm$ 0.264     | ND                  | 1.538 $\pm$ 0.003     | 10.457 $\pm$ 1.670     | ND                  | ND                   | ND                     |
|       | 15   | 3-O-Caffeoylquinic acid*                  | 2.494 $\pm$ 0.326     | 13.661 $\pm$ 0.115  | 9.543 $\pm$ 0.049     | ND                     | 47.754 $\pm$ 0.141  | ND                   | ND                     |
|       | 18   | Ferulic acid-glucoside                    | ND                    | ND                  | 0.839 $\pm$ 0.001     | 0.208 $\pm$ 0.057      | ND                  | 3.912 $\pm$ 0.014    | 0.498 $\pm$ 0.062      |
|       | 19   | Ferulic acid derivative                   | ND                    | ND                  | ND                    | ND                     | ND                  | 0.408 $\pm$ 0.003    | ND                     |
|       | 20   | Caffeic acid glucuronide                  | ND                    | ND                  | ND                    | 0.302 $\pm$ 0.006      | ND                  | ND                   | ND                     |
|       | 21   | Caffeic acid derivative                   | 0.240 $\pm$ 0.033     | ND                  | ND                    | ND                     | ND                  | ND                   | ND                     |
|       | 22   | Ferulic acid                              | ND                    | ND                  | 1.904 $\pm$ 0.011     | ND                     | ND                  | ND                   | ND                     |
|       | 23   | <i>p</i> -Coumaric acid derivative        | ND                    | 2.528 $\pm$ 0.042   | ND                    | ND                     | ND                  | ND                   | ND                     |
|       | 24   | Ferulic acid derivative                   | ND                    | ND                  | ND                    | ND                     | ND                  | ND                   | 0.774 $\pm$ 0.073      |
|       | 26   | Sinapic acid -glucoside                   | ND                    | ND                  | ND                    | ND                     | ND                  | ND                   | 3.354 $\pm$ 0.356      |
|       | 29   | Feruloylglucaric acid                     | ND                    | ND                  | ND                    | ND                     | ND                  | ND                   | 0.509 $\pm$ 0.064      |
|       | 30   | Caffeoylquinic acid derivative            | ND                    | 2.720 $\pm$ 0.195   | ND                    | ND                     | ND                  | ND                   | ND                     |
|       | 32   | Caffeic acid derivative                   | ND                    | 0.283 $\pm$ 0.106   | ND                    | ND                     | ND                  | ND                   | ND                     |
|       | 34   | <i>p</i> -Coumaric acid derivative        | ND                    | -                   | 0.175 $\pm$ 0.001     | ND                     | 4.536 $\pm$ 0.141   | ND                   | ND                     |
|       | 38   | <i>p</i> -Coumaroylquinic acid (isomer 1) | ND                    | 11.764 $\pm$ 0.200  | 3.644 $\pm$ 0.003     | ND                     | 78.310 $\pm$ 0.141  | ND                   | 0.623 $\pm$ 0.078      |

Table S1. Cont.

| Class | Peak | Phenolic Compounds                                        | <i>I. crithmoides</i> | <i>S. fruticosa</i> | <i>S. ramosissima</i> | <i>D. crassifolium</i> | <i>C. maritimum</i> | <i>M. nodiflorum</i> | <i>M. crystallinum</i> |
|-------|------|-----------------------------------------------------------|-----------------------|---------------------|-----------------------|------------------------|---------------------|----------------------|------------------------|
| HCA   | 39   | <i>p</i> -Coumaric acid derivative                        | ND                    | ND                  | ND                    | ND                     | ND                  | 0.694 ± 0.003        | ND                     |
|       | 40   | Ferulic acid derivative                                   | ND                    | ND                  | 0.496 ± 0.014         | ND                     | ND                  | ND                   | ND                     |
|       | 41   | <i>p</i> -Coumaroylquinic acid (isomer 2)                 | ND                    | ND                  | 1.307 ± 0.304         | ND                     | 43.242 ± 0.283      | ND                   | ND                     |
|       | 43   | Feruloylquinic acid                                       | 1.623 ± 0.285         | ND                  | ND                    | ND                     | ND                  | ND                   | ND                     |
|       | 44   | 3- <i>O-p</i> -Coumaroyl-5- <i>O</i> -caffeoylquinic acid | 0.132 ± 0.007         | 3.240 ± 0.082       | ND                    | ND                     | ND                  | ND                   | ND                     |
|       | 47   | <i>p</i> -Coumaric acid derivative                        | ND                    | ND                  | ND                    | 0.991 ± 0.010          | ND                  | ND                   | ND                     |
|       | 54   | <i>p</i> -Coumaric acid derivative                        | ND                    | ND                  | ND                    | ND                     | ND                  | ND                   | 14.490 ± 0.020         |
|       | 56   | <i>p</i> -Coumaric acid derivative                        | ND                    | ND                  | ND                    | ND                     | ND                  | ND                   | 17.150 ± 0.184         |
|       | 61   | 3,4-Dicaffeoylquinic acid                                 | ND                    | ND                  | 25.724 ± 0.368        | ND                     | ND                  | ND                   | ND                     |
|       | 62   | <i>p</i> -Coumaric acid glucoside derivative              | ND                    | ND                  | ND                    | ND                     | ND                  | ND                   | 0.141 ± 0.010          |
|       | 66   | <i>p</i> -Coumaric acid derivative                        | 1.120 ± 0.032         | ND                  | ND                    | ND                     | ND                  | ND                   | ND                     |
|       | 67   | 3,5-Dicaffeoylquinic acid                                 | ND                    | ND                  | 31.440 ± 0.557        | ND                     | 5.560 ± 0.085       | ND                   | ND                     |
|       | 71   | <i>p</i> -Coumaric acid derivative                        | ND                    | 1.985 ± 0.205       | ND                    | ND                     | ND                  | ND                   | ND                     |
|       | 74   | 4,5-Dicaffeoylquinic acid                                 | ND                    | ND                  | 18.938 ± 0.945        | ND                     | ND                  | ND                   | ND                     |
|       | 75   | <i>p</i> -Coumaric acid derivative                        | ND                    | 1.145 ± 0.055       | ND                    | ND                     | ND                  | ND                   | ND                     |
|       | 77   | <i>p</i> -Coumaric acid derivative                        | ND                    | 0.624 ± 0.065       | ND                    | ND                     | ND                  | ND                   | ND                     |
|       | 78   | <i>p</i> -Coumaric acid derivative                        | ND                    | ND                  | ND                    | ND                     | 1.228 ± 0.057       | ND                   | ND                     |
|       | 80   | Caffeoylhydrocaffeoylquinic acid                          | ND                    | ND                  | 2.661 ± 0.013         | ND                     | ND                  | ND                   | ND                     |
|       | 81   | Caffeic acid-glucuronide-glucoside (isomer 2)             | 0.163 ± 0.008         | ND                  | ND                    | ND                     | ND                  | ND                   | ND                     |
|       | 84   | Caffeoylquinic acid derivative                            | ND                    | ND                  | ND                    | ND                     | ND                  | 0.387 ± 0.001        | ND                     |
|       | 86   | Malonyl-3,4- <i>O</i> -dicaffeoylquinic acid derivative   | ND                    | ND                  | ND                    | 0.814 ± 0.127          | ND                  | ND                   | ND                     |
|       | 88   | <i>p</i> -Coumaric acid derivative                        | ND                    | ND                  | ND                    | 7.747 ± 0.242          | ND                  | ND                   | ND                     |
|       | 89   | Ferulic acid derivative                                   | ND                    | ND                  | ND                    | 8.577 ± 0.129          | ND                  | ND                   | ND                     |
|       | 90   | Ferulic acid derivative                                   | ND                    | ND                  | ND                    | 0.801 ± 0.208          | ND                  | ND                   | ND                     |
|       | 93   | <i>p</i> -Coumaric acid derivative                        | ND                    | ND                  | ND                    | 0.829 ± 0.131          | ND                  | ND                   | ND                     |
|       | 94   | 3,5-Diferuoylquinic acid                                  | ND                    | ND                  | ND                    | ND                     | ND                  | 0.167 ± 0.001        | ND                     |

Table S1. Cont.

| Class   | Peak | Phenolic Compounds                   | <i>I. crithmoides</i>       | <i>S. fruticosa</i>         | <i>S. ramosissima</i>        | <i>D. crassifolium</i>      | <i>C. maritimum</i>          | <i>M. nodiflorum</i>       | <i>M. crystallinum</i>      |
|---------|------|--------------------------------------|-----------------------------|-----------------------------|------------------------------|-----------------------------|------------------------------|----------------------------|-----------------------------|
|         |      | <b>Σ HCA</b>                         | 9.478 ± 0.960 <sup>e</sup>  | 40.138 ± 1.099 <sup>c</sup> | 102.462 ± 2.302 <sup>b</sup> | 30.726 ± 2.058 <sup>d</sup> | 191.869 ± 1.003 <sup>a</sup> | 6.050 ± 0.03 <sup>e</sup>  | 37.786 ± 0.942 <sup>c</sup> |
| HBA     | 2    | Protocatechuic acid-glucoside        | 0.179 ± 0.005               | ND                          | ND                           | ND                          | 1.508 ± 0.048                | ND                         | ND                          |
|         | 3    | 5-Galloylquinic acid                 | ND                          | 0.269 ± 0.075               | ND                           | ND                          | ND                           | ND                         | ND                          |
|         | 4    | Gallic acid derivative               | 0.429 ± 0.032               | ND                          | ND                           | ND                          | ND                           | ND                         | ND                          |
|         | 6    | Syringic acid                        | 0.538 ± 0.013               | ND                          | ND                           | ND                          | ND                           | ND                         | ND                          |
|         | 9    | Protocatechuic-acid-arabinoside      | ND                          | 1.972 ± 0.229               | 9.609 ± 0.202                | ND                          | ND                           | ND                         | ND                          |
|         | 17   | Gallic acid derivative               | 0.222 ± 0.009               | ND                          | ND                           | ND                          | ND                           | ND                         | ND                          |
|         | 37   | Syringic acid derivative             | ND                          | ND                          | ND                           | ND                          | ND                           | 0.179 ± 0.001              | ND                          |
|         | 63   | Digalloyl quinic acid rhamnoside     | ND                          | ND                          | ND                           | ND                          | ND                           | 0.253 ± 0.001              | ND                          |
|         | 85   | Galloylquinic acid derivative        | ND                          | ND                          | ND                           | ND                          | ND                           | 0.163 ± 0.001              | ND                          |
|         | 91   | Galloylquinic acid derivative        | ND                          | ND                          | ND                           | ND                          | ND                           | 0.379 ± 0.001              | ND                          |
|         |      | <b>Σ HBA</b>                         | 1.368 ± 0.059 <sup>c</sup>  | 2.241 ± 0.304 <sup>b</sup>  | 9.609 ± 0.202 <sup>a</sup>   | ND                          | 1.508 ± 0.048 <sup>c</sup>   | 0.974 ± 0.004 <sup>c</sup> | ND                          |
|         |      | <b>Σ Phenolic acids</b>              | 10.846 ± 0.078 <sup>f</sup> | 42.379 ± 0.092 <sup>c</sup> | 112.071 ± 0.178 <sup>b</sup> | 30.726 ± 0.275 <sup>c</sup> | 193.377 ± 0.112 <sup>a</sup> | 7.024 ± 0.004 <sup>g</sup> | 37.786 ± 0.109 <sup>d</sup> |
| Flavone | 25   | Apigenin 6-C-glucoside-7-O-glucoside | ND                          | ND                          | ND                           | ND                          | 8.688 ± 0.113                | ND                         | ND                          |
|         | 42   | Chrysin-6-C-ara-8-C-glu              | ND                          | ND                          | ND                           | ND                          | ND                           | 0.643 ± 0.007              | ND                          |
|         | 46   | Acacetin 3,6-di-C-glucoside          | ND                          | ND                          | ND                           | ND                          | ND                           | ND                         | 0.449 ± 0.038               |
|         | 50   | Chrysin-6-C-glucosyl-8-C-arabinoside | ND                          | ND                          | ND                           | ND                          | ND                           | ND                         | 7.357 ± 0.480               |
|         | 60   | Apigenin 6-C-glucoside               | ND                          | ND                          | ND                           | ND                          | 1.288 ± 0.057                | ND                         | ND                          |
|         | 64   | Luteolin derivative                  | ND                          | ND                          | ND                           | 1.684 ± 0.105               | ND                           | ND                         | ND                          |
|         | 68   | Diosmetin 7-O-rutinoside             | ND                          | ND                          | ND                           | ND                          | 0.887 ± 0.004                | ND                         | ND                          |
|         | 76   | Vitexin (apigenin-8-C-glu)           | 0.319 ± 0.010               | ND                          | ND                           | ND                          | ND                           | ND                         | ND                          |
|         | 87   | Vitexin derivative                   | ND                          | ND                          | ND                           | ND                          | ND                           | 0.160 ± 0.003              | ND                          |
|         |      | <b>Σ Flavone</b>                     | 0.319 ± 0.010 <sup>e</sup>  | ND                          | ND                           | 1.684 ± 0.105 <sup>c</sup>  | 10.863 ± 0.174 <sup>a</sup>  | 0.803 ± 0.010 <sup>d</sup> | 7.806 ± 0.518 <sup>b</sup>  |

Table S1. Cont.

| Class     | Peak               | Phenolic Compounds                              | <i>I. crithmoides</i>      | <i>S. fruticosa</i>         | <i>S. ramosissima</i>      | <i>D. crassifolium</i>     | <i>C. maritimum</i>        | <i>M. nodiflorum</i>        | <i>M. crystallinum</i>     |
|-----------|--------------------|-------------------------------------------------|----------------------------|-----------------------------|----------------------------|----------------------------|----------------------------|-----------------------------|----------------------------|
| Flavanol  | 10                 | Gallocatechin                                   | 0.167 ± 0.024              | 0.239 ± 0.004               | 0.299 ± 0.001              | ND                         | ND                         | 3.026 ± 0.003               | 0.182 ± 0.023              |
|           | 14                 | Epigallocatechin                                | ND                         | ND                          | ND                         | 0.862 ± 0.107              | ND                         | 0.510 ± 0.003               | 0.519 ± 0.047              |
|           | 51                 | Epicatechin hydrate                             | ND                         | ND                          | ND                         | ND                         | ND                         | 1.064 ± 0.011               | ND                         |
|           | 52                 | Gallocatechin derivative                        | 0.549 ± 0.035              | ND                          | ND                         | ND                         | ND                         | ND                          | ND                         |
|           | 55                 | Epicatechin derivative                          | ND                         | 11.534 ± 0.164              | ND                         | ND                         | ND                         | ND                          | ND                         |
|           | <b>Σ Flavanol</b>  |                                                 | 0.716 ± 0.059 <sup>c</sup> | 11.773 ± 0.168 <sup>a</sup> | 0.299 ± 0.001 <sup>d</sup> | 0.862 ± 0.107 <sup>c</sup> | ND                         | 4.600 ± 0.017 <sup>b</sup>  | 0.701 ± 0.007 <sup>c</sup> |
| Flavanone | 16                 | Pinobanksin-3-O-pentanoate                      | ND                         | ND                          | ND                         | ND                         | 0.731 ± 0.048              | ND                          | 1.571 ± 0.273              |
|           | 31                 | Pinobanksin-5-methyl ether-3-O-acetate (isomer) | 6.382 ± 0.176              | ND                          | ND                         | ND                         | ND                         | ND                          | ND                         |
|           | 33                 | Pinocembrin derivative                          | ND                         | ND                          | ND                         | ND                         | ND                         | 0.338 ± 0.057               | ND                         |
|           | 48                 | Eriodictyol-O-hexoside                          | ND                         | 7.071 ± 0.114               | ND                         | ND                         | ND                         | 2.606 ± 0.011               | ND                         |
|           | 49                 | Erydictiol                                      | ND                         | ND                          | ND                         | ND                         | ND                         | 8.568 ± 0.090               | ND                         |
|           | 92                 | Pinobanksin-5-methyl ether-3-O-acetate (isomer) | ND                         | ND                          | ND                         | ND                         | ND                         | 1.553 ± 0.004               | ND                         |
|           | <b>Σ Flavanone</b> |                                                 | 6.382 ± 0.176 <sup>c</sup> | 7.071 ± 0.114 <sup>b</sup>  | ND                         | ND                         | 0.731 ± 0.048 <sup>e</sup> | 13.065 ± 0.162 <sup>a</sup> | 1.571 ± 0.273 <sup>d</sup> |
| Flavonol  | 7                  | Rhamnetin                                       | 0.194 ± 0.082              | ND                          | ND                         | ND                         | ND                         | ND                          | ND                         |
|           | 27                 | Avicularin                                      | ND                         | ND                          | ND                         | ND                         | ND                         | 2.422 ± 0.003               | ND                         |
|           | 35                 | Kaempferol derivative                           | ND                         | ND                          | ND                         | ND                         | ND                         | ND                          | 0.576 ± 0.014              |
|           | 45                 | Quercetin-3-O-rutinoside                        | ND                         | ND                          | ND                         | ND                         | 11.854 ± 0.141             | ND                          | ND                         |
|           | 53                 | Quercetin 3-O-glucoside*                        | ND                         | ND                          | 3.338 ± 0.009              | ND                         | 5.932 ± 0.042              | ND                          | ND                         |
|           | 58                 | Isorhamnetin-rutinoside derivative              | ND                         | ND                          | ND                         | 13.825 ± 0.100             | ND                         | ND                          | ND                         |
|           | 59                 | Rhamnetin hexosyl pentoside                     | ND                         | 27.388 ± 0.127              | ND                         | ND                         | ND                         | ND                          | ND                         |
|           | 65                 | Isorhamnetin 3-O-robinobioside                  | ND                         | 20.871 ± 0.143              | ND                         | ND                         | ND                         | ND                          | ND                         |
|           | 69                 | Quercetin dipentoside                           | ND                         | ND                          | ND                         | ND                         | ND                         | 0.133 ± 0.001               | ND                         |
|           | 70                 | Quercetin-3-O-glucoside derivative              | ND                         | ND                          | ND                         | ND                         | ND                         | ND                          | 0.687 ± 0.066              |
|           | 72                 | Quercetin derivative                            | ND                         | ND                          | ND                         | ND                         | ND                         | 0.316 ± 0.006               | ND                         |
|           | 73                 | Isorhamnetin-glucoside derivative               | ND                         | ND                          | ND                         | 7.281 ± 0.103              | ND                         | ND                          | ND                         |

| Table S1. <i>Cont.</i> |      |                                                               |                             |                              |                              |                             |                              |                             |                             |
|------------------------|------|---------------------------------------------------------------|-----------------------------|------------------------------|------------------------------|-----------------------------|------------------------------|-----------------------------|-----------------------------|
| Class                  | Peak | Phenolic Compounds                                            | <i>I. crithmoides</i>       | <i>S. fruticosa</i>          | <i>S. ramosissima</i>        | <i>D. crassifolium</i>      | <i>C. maritimum</i>          | <i>M. nodiflorum</i>        | <i>M. crystallinum</i>      |
| Flavonols              | 82   | Isorhamnetin-3-O-glucoside (dimer)                            | ND                          | ND                           | 2.828 ± 0.450                | ND                          | ND                           | ND                          | ND                          |
|                        | 83   | Kaempferol                                                    | ND                          | ND                           | ND                           | ND                          | ND                           | ND                          | 0.594 ± 0.062               |
|                        |      | 3-(2''-[glucosyl-(1->3)-rhamnosyl]-6''-rhamnosyl galactoside) |                             |                              |                              |                             |                              |                             |                             |
|                        |      | Σ Flavonol                                                    | 0.194 ± 0.082 <sup>s</sup>  | 48.259 ± 0.270 <sup>a</sup>  | 6.166 ± 0.459 <sup>d</sup>   | 21.106 ± 0.203 <sup>b</sup> | 17.786 ± 0.183 <sup>c</sup>  | 2.871 ± 0.010 <sup>e</sup>  | 1.857 ± 0.142 <sup>f</sup>  |
| Flavanonol             | 36   | Dihydroquercetin                                              | ND                          | 6.404 ± 0.792                | ND                           | ND                          | ND                           | ND                          | ND                          |
|                        |      | Σ Flavanonol                                                  | ND                          | 6.404 ± 0.792                | ND                           | ND                          | ND                           | ND                          | ND                          |
|                        |      | Σ Flavonoids                                                  | 7.611 ± 0.065 <sup>f</sup>  | 73.507 ± 0.224 <sup>a</sup>  | 6.465 ± 0.153 <sup>s</sup>   | 23.652 ± 0.103 <sup>c</sup> | 29.38 ± 0.068 <sup>b</sup>   | 21.339 ± 0.015 <sup>d</sup> | 11.935 ± 0.125 <sup>e</sup> |
| Coumarin               | 28   | Coumarin glycoside ester                                      | ND                          | ND                           | ND                           | 1.458 ± 0.215               | ND                           | ND                          | ND                          |
| Monocarboxylic acid    | 57   | Piscidic acid derivative                                      | 1.828 ± 0.219               | ND                           | ND                           | ND                          | ND                           | ND                          | ND                          |
| Gallotannin            | 79   | Hexahydroxydiphenoyl-Glucose                                  | ND                          | ND                           | ND                           | ND                          | ND                           | 0.177 ± 0.001               | ND                          |
|                        |      | Σ Phenolic compounds                                          | 18.457 ± 0.074 <sup>f</sup> | 115.886 ± 0.137 <sup>b</sup> | 118.536 ± 0.174 <sup>b</sup> | 55.836 ± 0.225 <sup>c</sup> | 222.757 ± 0.094 <sup>a</sup> | 28.363 ± 0.010 <sup>e</sup> | 49.721 ± 0.114 <sup>d</sup> |

The letters (a-g) indicate significant differences between the halophytes using the Tukey’s test (p < 0.05). ND: Not Detected; LOQ = 0.01 µg compound/g FW.

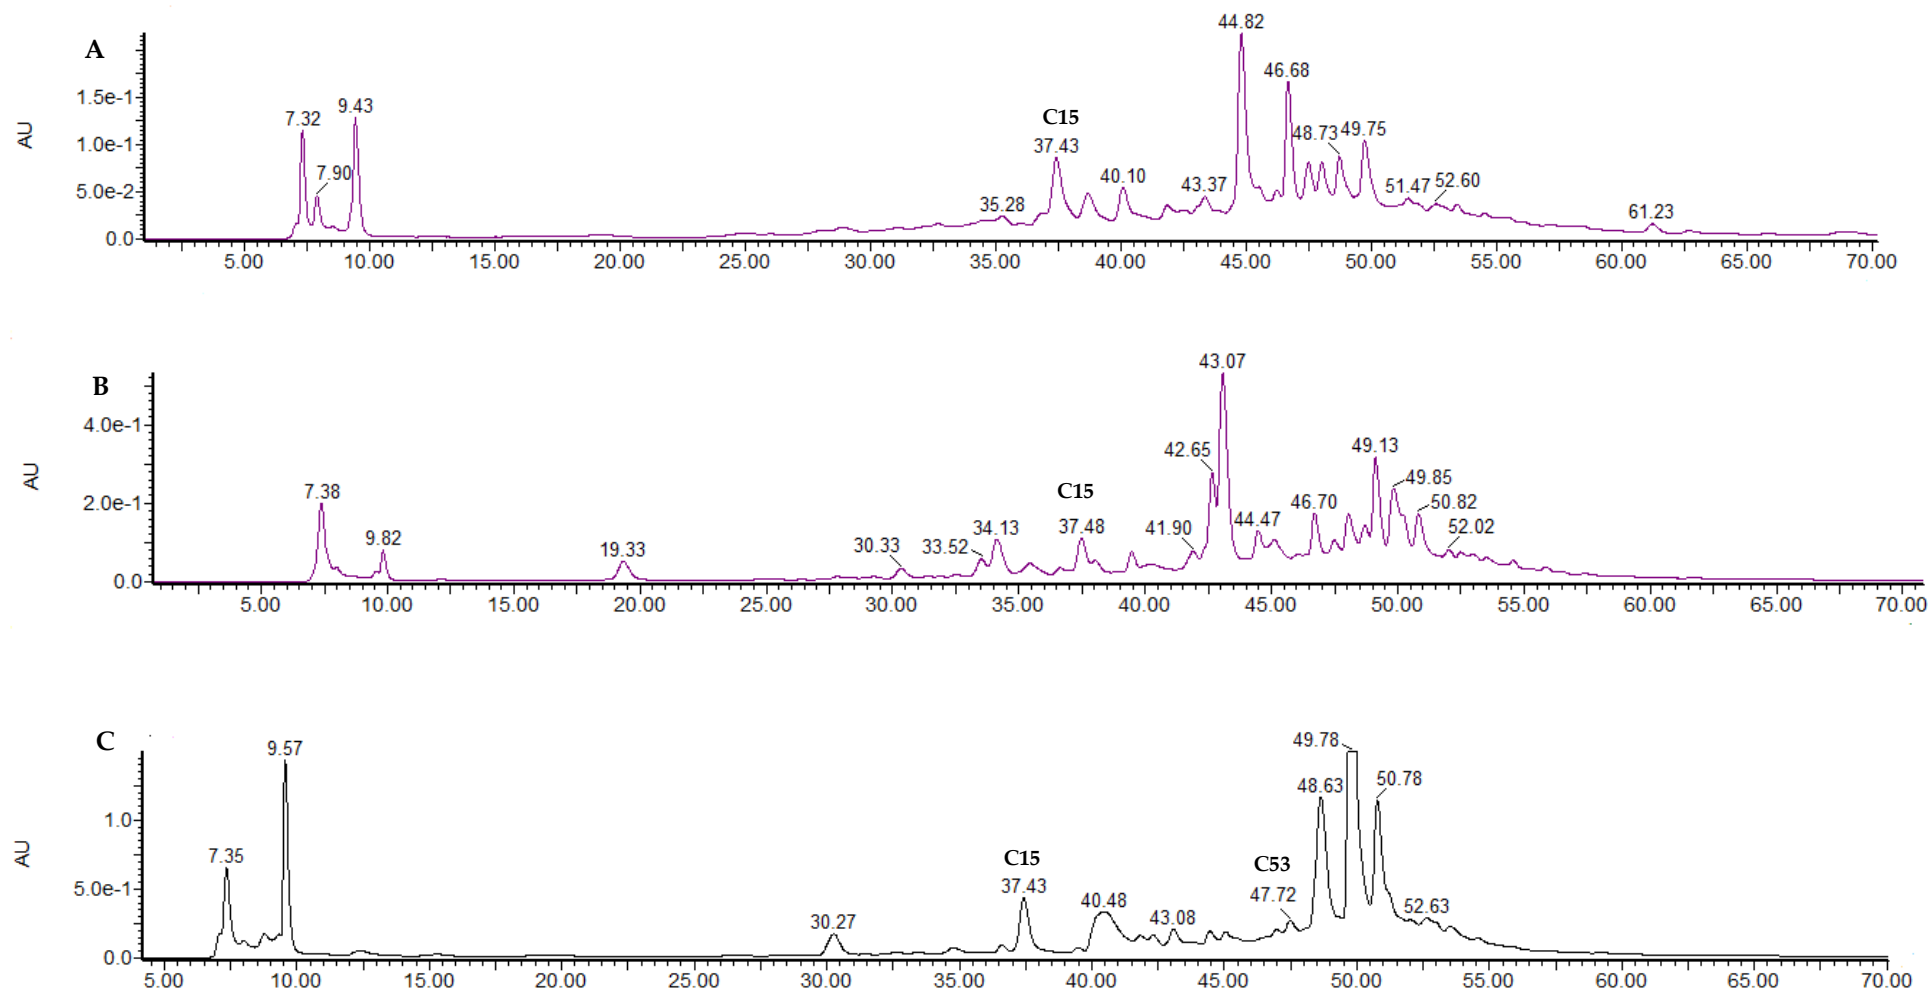

**Figure S2.** Chromatographic profile at 280 nm by HPLC-DAD-ESI-MS/MS of the halophytes species. *I. crithmoides* (A); *S. fruticosa* (B); *S. ramosissima* (C); *D. crassifolium*(D); *C. maritimum* (E); *M. nodiflorum* (F) and *M. crystallinum* (G).

Figure S2. Cont.

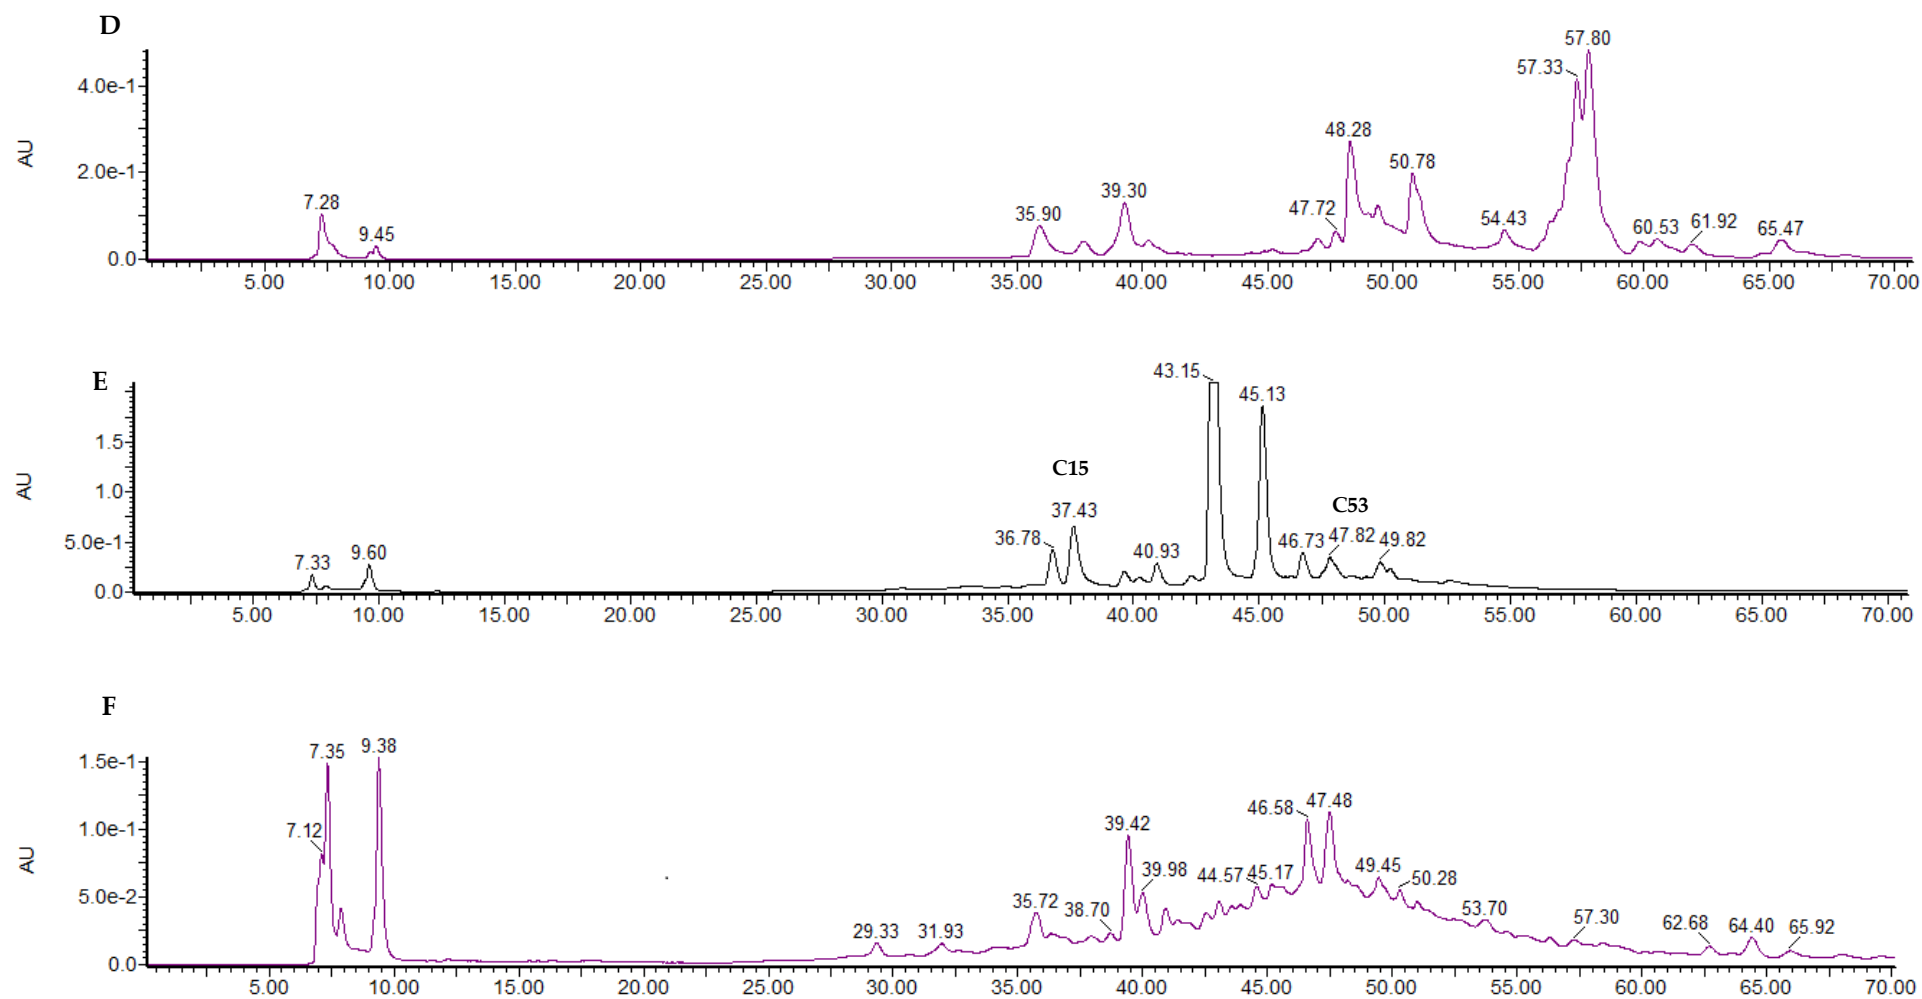

**Figure S2.** Chromatographic profile at 280 nm by HPLC-DAD-ESI-MS/MS of the halophytes species. *I. crithmoides* (A); *S. fruticosa* (B); *S. ramosissima* (C); *D. crassifolium* (D); *C. maritimum* (E); *M. nodiflorum* (F) and *M. crystallinum* (G).



Figure S2. Cont.

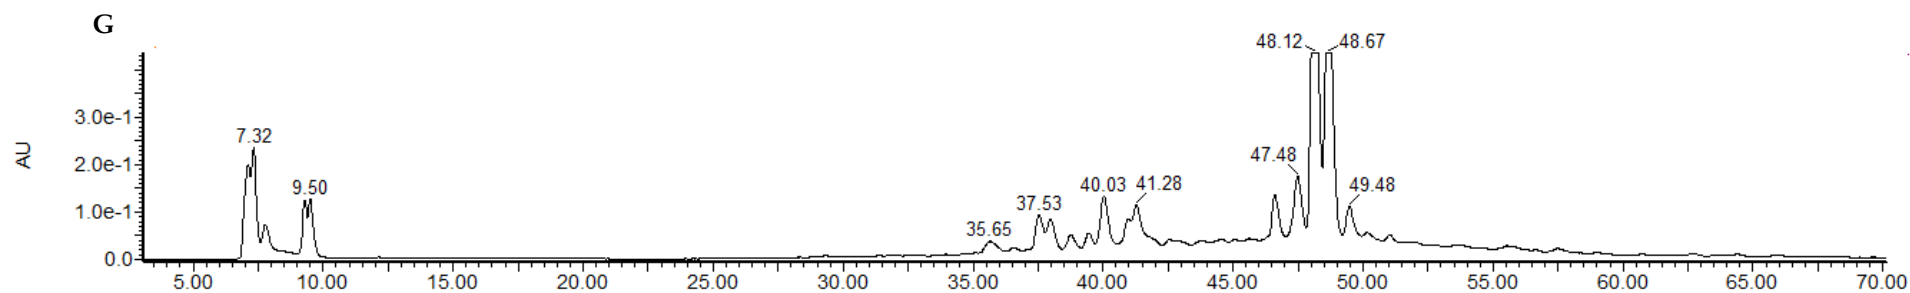

**Figure S2.** Chromatographic profile at 280 nm by HPLC-DAD-ESI-MS/MS of the halophytes species. *I. crithmoides* (A); *S. fruticosa* (B); *S. ramosissima* (C); *D. crassifolium*(D); *C. maritimum* (E); *M. nodiflorum* (F) and *M. crystallinum* (G).

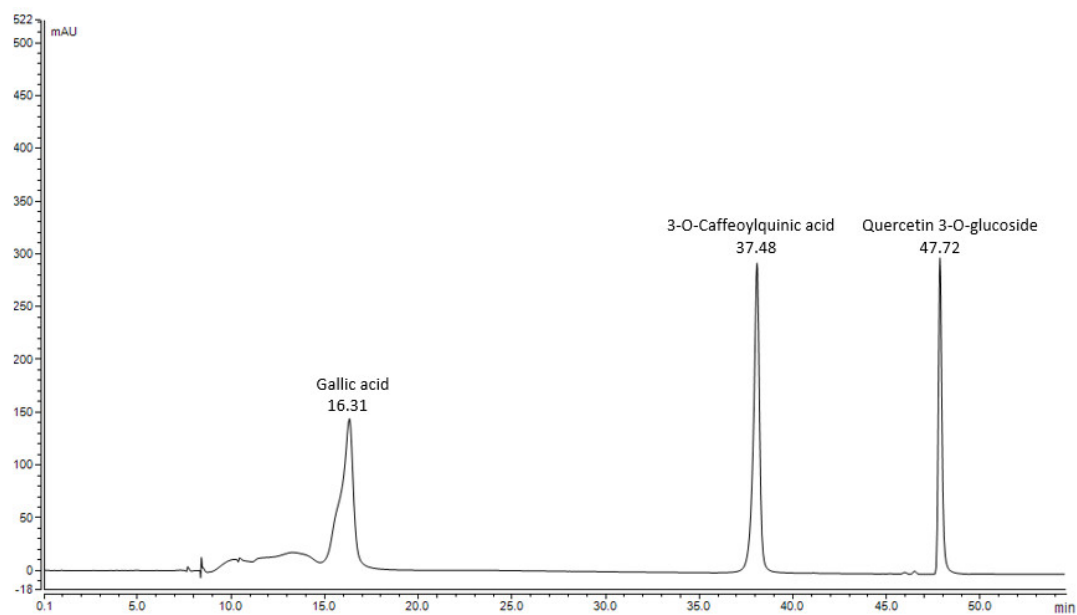

**Figure S3.** Chromatographic profile at 280 nm by HPLC-DAD of the standards of phenolic compounds: gallic acid, chlorogenic acid (3-O-caffeoylquinic acid) and quercetin-3-glucoside.

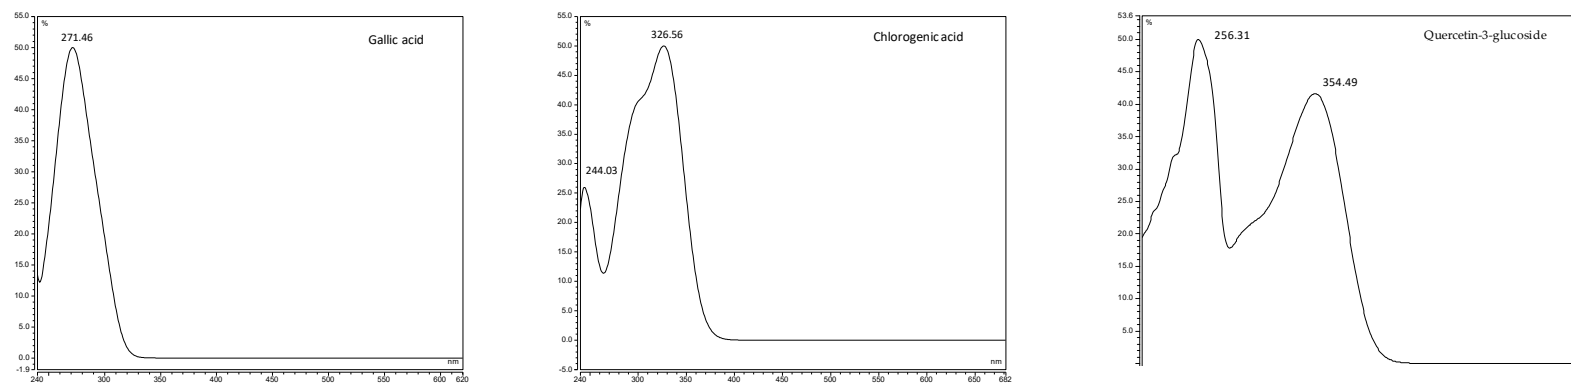

**Figure S4.** UV-Visible spectra of the phenolic compounds standards: gallic acid, chlorogenic acid (3-O-caffeoylquinic acid) and quercetin-3-glucoside.

**Table S2.** Characterization parameters (retention time, RT, % of total peak area, tentative identification, chemical classes, odor, calculated/theoretical linear retention index, LRI) of volatile compounds in halophyte species using SPME-GC–MS. The references used to support the tentative identifications were indicated.

| Species             | Peak | RT (min) <sup>a</sup> | Area% | Tentative Identification   | Chemical Classes | Odor Description <sup>b</sup>                           | Calculated LRI <sup>c</sup> | Theoretical LRI | References    |
|---------------------|------|-----------------------|-------|----------------------------|------------------|---------------------------------------------------------|-----------------------------|-----------------|---------------|
| <i>C. maritimum</i> | 1    | 7.24                  | 0.91  | 3-hexen-1-ol               | Alcohol          | green, marine, seaweed                                  | 860                         | 861             | [153-155]     |
|                     | 2    | 9.55                  | 0.71  | alpha-thujene              | Terpene          | herbal, green, weak earthy                              | 927                         | 934             | [156-158]     |
|                     | 3    | 9.742                 | 1.71  | alpha-pinene               | Terpene          | oily, green                                             | 932                         | 933             | [159,160]     |
|                     | 4    | 11.283                | 17.24 | alpha-fenchene             | Terpene          | fruity, fresh                                           | 973                         | 962             | [161,162]     |
|                     | 5    | 11.992                | 1.01  | beta-myrcene               | Terpene          | herbaceous, sweet                                       | 992                         | 992             | [158-163]     |
|                     | 6    | 12.817                | 0.40  | alpha-terpinene            | Terpene          | resinous                                                | 1016                        | 1017            | [158,164]     |
|                     | 7    | 13.125                | 13.41 | <i>p</i> -cymene           | Terpene          | green, fruity, aromatic                                 | 1025                        | 1031            | [159,165-167] |
|                     | 8    | 13.225                | 0.40  | beta-phellandrene          | Terpene          | NF                                                      | 1028                        | 1032            | [168,169]     |
|                     | 9    | 13.65                 | 8.87  | ( <i>Z</i> )-beta-ocimene  | Terpene          | floral, herbaceous                                      | 1041                        | 1037            | [168,169]     |
|                     | 10   | 13.992                | 0.30  | ( <i>E</i> )-beta-ocimene  | Terpene          | floral, herbaceous                                      | 1051                        | 1047            | [168,169]     |
|                     | 11   | 14.358                | 30.44 | <i>m</i> -mentha-4,8-diene | Terpene          | NF                                                      | 1062                        | 1081            | [168]         |
|                     | 12   | 15.25                 | 0.30  | alpha-terpinolene          | Terpene          | woody, herbaceous                                       | 1088                        | 1086            | [164,170]     |
|                     | 13   | 16.617                | 0.20  | allo-ocimene               | Terpene          | fresh                                                   | 1131                        | 1131            | [171,172]     |
|                     | 14   | 18.075                | 0.20  | 4-terpineol                | Terpene          | roasted, woody                                          | 1178                        | 1178            | [173,174]     |
|                     | 15   | 19.65                 | 23.59 | thymol methyl ether        | Terpene          | oregano-like, thyme-like, rose-<br>mary-like, medicinal | 1239                        | 1237            | [175-176]     |
|                     | 16   | 25.242                | 0.20  | alpha-bergamotene          | Terpene          | wood, warm, tea                                         | 1439                        | 1438            | [174,178]     |
|                     | 17   | 27.092                | 0.10  | beta-bisabolene            | Terpene          | NF                                                      | 1513                        | 1512            | [179]         |

Table S2. *Cont.*

| Species               | Peak | RT (min) <sup>a</sup> | Area% | Tentative Identification          | Chemical Classes | Odor Description <sup>b</sup>                           | Calculated LRI <sup>c</sup> | Theoretical LRI | References    |
|-----------------------|------|-----------------------|-------|-----------------------------------|------------------|---------------------------------------------------------|-----------------------------|-----------------|---------------|
| <i>I. crithmoides</i> | 1    | 7.00                  | 0.42  | 3-hexen-1-ol                      | Alcohol          | green, marine, seaweed                                  | 860                         | 861             | [153-155]     |
|                       | 2    | 7.53                  | 0.73  | 1-hexanol                         | Alcohol          | woody, sweet, green, fruity                             | 873                         | 872             | [180-182]     |
|                       | 3    | 9.74                  | 0.52  | alpha-pinene                      | Terpene          | oily, green                                             | 932                         | 933             | [159,160]     |
|                       | 4    | 10.26                 | 8.34  | camphene                          | Terpene          | sweet                                                   | 946                         | 947             | [159,160,183] |
|                       | 5    | 11.31                 | 0.73  | beta-pinene                       | Terpene          | woody, green, pine-like                                 | 974                         | 979             | [158,14,183]  |
|                       | 6    | 12.01                 | 0.21  | beta-myrcene                      | Terpene          | herbaceous, sweet                                       | 993                         | 992             | [158-162]     |
|                       | 7    | 12.40                 | 17.41 | alpha-phellandrene                | Terpene          | fresh, green                                            | 1004                        | 1005            | [164,181,183] |
|                       | 8    | 12.63                 | 0.10  | 3-hexen-1-ol acetate              | Ester            | fruity, floral                                          | 1010                        | 1007            | [180,184]     |
|                       | 9    | 12.87                 | 0.31  | hexyl acetate                     | Ester            | fruit, herb                                             | 1018                        | 1019            | [185,186]     |
|                       | 10   | 13.15                 | 22.94 | <i>p</i> -cymene                  | Terpene          | green, fruity, aromatic                                 | 1026                        | 1031            | [159,165-167] |
|                       | 11   | 13.24                 | 2.29  | limonene                          | Terpene          | pine/chemical, floral/fresh                             | 1029                        | 1029            | [187,188]     |
|                       | 12   | 14.28                 | 0.21  | gamma-terpinene                   | Terpene          | green, woody                                            | 1059                        | 1059            | [159,170,189] |
|                       | 13   | 15.25                 | 1.15  | alpha-terpinolene                 | Terpene          | woody, herbaceous                                       | 1088                        | 1086            | [164,170]     |
|                       | 14   | 17.71                 | 0.31  | borneol                           | Terpene          | camphoraceous, earthy                                   | 1167                        | 1165            | [190,191]     |
|                       | 15   | 18.08                 | 0.21  | 4-terpineol                       | Terpene          | roasted, woody                                          | 1179                        | 1178            | [173,174]     |
|                       | 16   | 19.78                 | 3.96  | thymol methyl ether               | Terpene          | oregano-like, thyme-like, rose-<br>mary-like, medicinal | 1236                        | 1237            | [175-177]     |
|                       | 17   | 20.10                 | 0.73  | allyl hexanoate                   | Ester            | sweet, fruity                                           | 1248                        | -               | [192]         |
|                       | 18   | 20.25                 | 17.52 | 2,4,6-trimethylacetophenone       | Ketone           | not found                                               | 1253                        | 1252            | [193]         |
|                       | 19   | 21.01                 | 0.63  | cyclooctyl acetate                | Ester            | not found                                               | 1279                        | 1279            | [194]         |
|                       | 20   | 21.26                 | 19.71 | isobornyl acetate                 | Ester            | herb, woody, sweet, minty                               | 1288                        | 1285            | [191,192]     |
|                       | 21   | 21.56                 | 0.21  | thymol                            | Terpene          | thyme-like, spicy                                       | 1299                        | 1293            | [157,195]     |
|                       | 22   | 23.80                 | 1.15  | cadinene                          | Terpene          | herb, burnt, sulphur                                    | 1382                        | 1362            | [196,197]     |
|                       | 23   | 24.92                 | 0.21  | 2-tert-Butyl-1,4-dimethoxybenzene | Terpene          | not found                                               | 1426                        | 1427            | [198]         |

Table S2. *Cont.*

| Species                | Peak | RT (min) <sup>a</sup> | Area% | Tentative Identification     | Chemical Classes | Odor Description <sup>b</sup>                         | Calculated LRI <sup>c</sup> | Theoretical LRI | References        |
|------------------------|------|-----------------------|-------|------------------------------|------------------|-------------------------------------------------------|-----------------------------|-----------------|-------------------|
| <i>D. crassifolium</i> | 1    | 5.23                  | 6.35  | hexanal                      | Aldehyde         | herbal, grassy, green                                 | 807                         | 801             | [154,180,184,199] |
|                        | 2    | 7.42                  | 6.69  | 3-hexen-1-ol                 | Alcohol          | green, marine, seaweed                                | 866                         | 861             | [153-155]         |
|                        | 3    | 7.88                  | 10.37 | 1-hexanol                    | Alcohol          | woody, sweet, green, fruity                           | 878                         | 872             | [180-182]         |
|                        | 4    | 8.19                  | 1.34  | <i>n</i> -butyl ether        | Ether            | not found                                             | 887                         | 860             | [200]             |
|                        | 5    | 9.27                  | 6.35  | oxime-methoxy-phenyl-        | Ester            | fishy                                                 | 916                         | 910             | [201,202]         |
|                        | 6    | 11.97                 | 1.67  | 2,2,4,6,6-pentamethylheptane | Terpene          | stony, dusty                                          | 990                         | 991             | [203,204]         |
|                        | 7    | 13.24                 | 9.03  | <i>p</i> -cymene             | Terpene          | green, fruity, aromatic                               | 1027                        | 1031            | [159,165-167]     |
|                        | 8    | 15.78                 | 1.00  | undecane                     | Hydrocarbon      | not found                                             | 1103                        | 1100            | [201]             |
|                        | 9    | 18.83                 | 3.34  | dodecane                     | Hydrocarbon      | alkane-like, chemical                                 | 1202                        | 1200            | [201,205]         |
|                        | 10   | 19.81                 | 20.74 | thymol methyl ether          | Terpene          | oregano-like, thyme-like,<br>rosemary-like, medicinal | 1236                        | 1237            | [175-177]         |
|                        | 11   | 20.23                 | 9.70  | 2,4,6-trimethylacetophenone  | Ketone           | not found                                             | 1251                        | 1252            | [193]             |
|                        | 12   | 21.52                 | 19.73 | isobornyl acetate            | Ester            | herb, woody, sweet, minty                             | 1287                        | 1285            | [191,192]         |
|                        | 13   | 23.80                 | 3.68  | alpha-gurjunene              | Terpene          | green, herbal                                         | 1382                        | 1407            | [190,206]         |

Table S2. *Cont.*

| Species              | Peak | RT (min) <sup>a</sup> | Area%    | Tentative Identification    | Chemical Classes | Odor Description <sup>b</sup>                         | Calculated LRI <sup>c</sup> | Theoretical LRI | References |
|----------------------|------|-----------------------|----------|-----------------------------|------------------|-------------------------------------------------------|-----------------------------|-----------------|------------|
| <i>M. nodiflorum</i> | 1    | 4.342                 | 1.258149 | 1-pentanol                  | Alcohol          | balsamic                                              | <800                        | 766             | [207,208]  |
|                      | 2    | 5.108                 | 1.372527 | octane                      | Hydrocarbon      | Alkane-like                                           | 803                         | 800             | [209]      |
|                      | 3    | 7.108                 | 8.578291 | 3-hexen-1-ol                | Alcohol          | green, marine, seaweed                                | 858                         | 861             | [153-155]  |
|                      | 4    | 7.683                 | 77.77651 | 1-hexanol                   | Alcohol          | woody, sweet, green, fruity                           | 873                         | 872             | [180-182]  |
|                      | 5    | 9.542                 | 0.228754 | alpha-thujene               | Terpene          | herbal, green, weak earthy                            | 924                         | 924             | [190,210]  |
|                      | 6    | 11.342                | 0.343132 | 1-heptanol                  | Alcohol          | Metallic                                              | 973                         | 967             | [211]      |
|                      | 7    | 11.925                | 2.85943  | 2-ethylbutanal              | Aldehyde         | green                                                 | 989                         | -               | [210]      |
|                      | 8    | 12.667                | 0.228754 | 3-hexen-1-ol acetate        | Ester            | fruity, floral                                        | 1010                        | 1007            | [180,184]  |
|                      | 9    | 12.883                | 0.800641 | hexyl acetate               | Ester            | fruit, herb                                           | 1016                        | 1019            | [185,186]  |
|                      | 10   | 12.983                | 1.830035 | trans-2-hexenyl acetate     | Ester            | fruity, sweet, herbaceous                             | 1019                        | 1018            | [213,214]  |
|                      | 11   | 13.258                | 0.343132 | limonene                    | Terpene          | pine, chemical, floral, fresh                         | 1028                        | 1029            | [188,215]  |
|                      | 12   | 14.908                | 0.125815 | 1-octanol                   | Alcohol          | citrus-like, herbal                                   | 1077                        | 1070            | [216,217]  |
|                      | 13   | 15.742                | 0.137253 | linalool                    | Terpene          | pleasant scent, floral                                | 1102                        | 1097            | [166,180]  |
|                      | 14   | 15.9                  | 0.343132 | 2,6-dimethylcyclohexanol    | Alcohol          | earthy                                                | 1107                        | 1108            | [218,219]  |
|                      | 15   | 18.025                | 0.457509 | 1-nonanol                   | Alcohol          | fatty                                                 | 1176                        | 1176            | [220,221]  |
|                      | 16   | 19.358                | 0.343132 | beta-cyclocitral            | Terpene          | sweet-tobacco, grape                                  | 1221                        | 1220            | [215,222]  |
|                      | 17   | 19.8                  | 1.258149 | thymol methyl ether         | Terpene          | oregano-like, thyme-like, rosemary-like,<br>medicinal | 1236                        | 1237            | [175-177]  |
|                      | 18   | 20.225                | 0.571886 | 2,4,6-trimethylacetophenone | Ketone           | not found                                             | 1251                        | 1252            | [193]      |
|                      | 19   | 21.233                | 0.915018 | isobornyl acetate           | Ester            | herb, woody, sweet, minty                             | 1286                        | 1285            | [190,191]  |
|                      | 20   | 23.8                  | 0.228754 | cadinene                    | Terpene          | herb, burnt, sulphur                                  | 1382                        | 1362            | [196,197]  |

Table S2. Cont.

| Species             | Peak | RT (min) <sup>a</sup> | Area% | Tentative Identification           | Chemical Classes | Odor Description <sup>b</sup> | Calculated LRI <sup>c</sup> | Theoretical LRI | References    |
|---------------------|------|-----------------------|-------|------------------------------------|------------------|-------------------------------|-----------------------------|-----------------|---------------|
| <i>S. fruticosa</i> | 1    | 7.41                  | 27.56 | 2-hexenal                          | Aldehyde         | floral, herbal                | 856                         | 861             | [153,180,184] |
|                     | 2    | 7.76                  | 44.04 | 1-hexanol                          | Alcohol          | woody, sweet, green, fruity   | 875                         | 872             | [180-182]     |
|                     | 3    | 10.28                 | 1.14  | camphene                           | Terpene          | sweet                         | 944                         | 947             | [159,160,183] |
|                     | 4    | 11.07                 | 4.15  | 2-hexenoic acid, methyl ester      | Ester            | not found                     | 966                         | 972             | [223]         |
|                     | 5    | 11.81                 | 0.31  | <i>n</i> -caproic acid vinyl ester | Ester            | not found                     | 986                         | 964             | [205]         |
|                     | 6    | 12.52                 | 3.83  | alpha-phellandrene                 | Terpene          | fresh, green                  | 1006                        | 1005            | [164,181,183] |
|                     | 7    | 12.81                 | 0.21  | 4-carene                           | Terpene          | sweet, pungent                | 1014                        | -               | [166]         |
|                     | 8    | 12.92                 | 0.10  | <i>trans</i> -2-hexenyl acetate    | Ester            | fruity, sweet, herbaceous     | 1017                        | 1018            | [213,214]     |
|                     | 9    | 13.05                 | 2.80  | <i>p</i> -cymene                   | Terpene          | green, fruity, aromatic       | 1022                        | 1031            | [159,165-167] |
|                     | 10   | 13.19                 | 1.66  | limonene                           | Terpene          | pine, chemical, floral, fresh | 1026                        | 1029            | [185,188]     |
|                     | 11   | 13.81                 | 0.62  | ethyl 2-hexenoate                  | Ester            | citrus-like, fatty            | 1045                        | 1053            | [224,225]     |
|                     | 12   | 15.20                 | 0.41  | alpha-terpinolene                  | Terpene          | woody, herbaceous             | 1085                        | 1086            | [164,170]     |
|                     | 13   | 15.46                 | 0.52  | 1-nonen-4-ol                       | Alcohol          | cardboard                     | 1093                        | 1094            | [226]         |
|                     | 14   | 20.14                 | 4.46  | <i>p</i> -(1-butenyl)anisole       | Hydrocarbon      | not found                     | 1248                        | 1259            | [227]         |
|                     | 15   | 20.92                 | 0.41  | 3-octen-1-ol, acetate              | Ester            | toasted nut, smoky, dusty     | 1275                        | 1279            | [184]         |
|                     | 16   | 21.18                 | 6.63  | isobornyl acetate                  | Ester            | herb, woody, sweet, minty     | 1284                        | 1285            | [190,191]     |
|                     | 17   | 23.71                 | 1.14  | cadinene                           | Terpene          | herb, burnt, sulphur          | 1378                        | 1362            | [196,197]     |

Table S2. *Cont.*

| Species                | Peak | RT (min) <sup>a</sup> | Area% | Tentative Identification        | Chemical Classes | Odor Description <sup>b</sup>                           | Calculated LRI <sup>c</sup> | Theoretical LRI | References            |
|------------------------|------|-----------------------|-------|---------------------------------|------------------|---------------------------------------------------------|-----------------------------|-----------------|-----------------------|
| <i>M. crystallinum</i> | 1    | 4.28                  | 1.78  | 1-pentanol                      | Alcohol          | balsamic                                                | 766                         | 766             | [207,208]             |
|                        | 2    | 5.07                  | 9.89  | hexanal                         | Aldehyde         | herbal, grassy, green                                   | 802                         | 801             | [154,180,184,199,208] |
|                        | 3    | 6.93                  | 36.66 | 2-hexenal                       | Aldehyde         | floral, herbal                                          | 853                         | 861             | [153,28,32]           |
|                        | 4    | 7.63                  | 40.33 | 1-hexanol                       | Alcohol          | woody, sweet, green, fruity                             | 872                         | 872             | [180-182]             |
|                        | 5    | 8.76                  | 0.11  | heptanal                        | Aldehyde         | penetrating oily, harsh                                 | 902                         | 902             | [182,199,228]         |
|                        | 6    | 9.57                  | 0.67  | methoxy-phenyl-oxime            | Ester            | fishy                                                   | 924                         | 916             | [201,202]             |
|                        | 7    | 11.55                 | 0.11  | 3,5,5-trimethyl-2-hexene        | Hydrocarbon      | not found                                               | 979                         | 977             | [201]                 |
|                        | 8    | 11.78                 | 0.22  | 1-octen-3-ol                    | Alcohol          | mushroom                                                | 985                         | 980             | [154,158,188]         |
|                        | 9    | 12.30                 | 0.11  | 3-octanol                       | Alcohol          | mushroom-like, herbal, nutty                            | 994                         | 998             | [157,229]             |
|                        | 10   | 12.69                 | 0.11  | <i>cis</i> -3-hexenyl acetate   | Ester            | fruity, green, floral                                   | 1011                        | 1007            | [180,184,230]         |
|                        | 11   | 12.92                 | 0.56  | hexyl acetate                   | Ester            | fruit, herb                                             | 1017                        | 1019            | [185,186]             |
|                        | 12   | 13.02                 | 0.22  | <i>trans</i> -2-hexenyl acetate | Ester            | fruity, sweet, herbaceous                               | 1020                        | 1018            | [213,214]             |
|                        | 13   | 13.13                 | 0.22  | <i>p</i> -cymene                | Terpene          | green, fruity, aromatic                                 | 1024                        | 1031            | [159,165-167]         |
|                        | 14   | 14.33                 | 0.33  | 3-carene                        | Terpene          | sweet, strong                                           | 1060                        | -               | [231]                 |
|                        | 15   | 14.98                 | 0.03  | 1-octanol                       | Alcohol          | citrus-like, herbal                                     | 1079                        | 1070            | [216,217]             |
|                        | 16   | 15.89                 | 1.22  | nonanal                         | Aldehyde         | green, citrus-like                                      | 1107                        | 1111            | [153,232]             |
|                        | 17   | 18.31                 | 0.22  | octanoic acid                   | Carboxylic acid  | fruity, faint, candy                                    | 1185                        | 1173            | [233,234]             |
|                        | 18   | 18.81                 | 0.33  | dodecane                        | Hydrocarbon      | alkane-like, chemical                                   | 1201                        | 1200            | [201,205]             |
|                        | 19   | 19.80                 | 2.78  | thymol methyl ether             | Terpene          | oregano-like, thyme-like, rose-<br>mary-like, medicinal | 1236                        | 1237            | [175-177]             |
|                        | 20   | 20.22                 | 1.22  | 2,4,6-trimethylacetophenone     | Ketone           | not found                                               | 1251                        | 1252            | [193]                 |
|                        | 21   | 21.05                 | 0.44  | nonanoic acid                   | Carboxylic acid  | fatty, cheesy                                           | 1280                        | 1275            | [157]                 |
|                        | 22   | 21.23                 | 2.33  | isobornyl acetate               | Ester            | herb, woody, sweet, minty                               | 1286                        | 1285            | [190,191]             |
|                        | 23   | 22.99                 | 0.09  | alpha-cubebene                  | Terpene          | herbaceous, waxy                                        | 1351                        | 1352            | [235,236]             |



**Table S2. Cont.**

| Species               | Peak | RT (min) <sup>a</sup> | Area% | Tentative Identification           | Chemical Classes | Odor Description <sup>b</sup> | Calculated LRI <sup>c</sup> | Theoretical LRI | References            |
|-----------------------|------|-----------------------|-------|------------------------------------|------------------|-------------------------------|-----------------------------|-----------------|-----------------------|
| <i>S. ramosissima</i> | 1    | 4.99                  | 6.30  | hexanal                            | Aldehyde         | herbal, grassy, green         | 800                         | 801             | [154,180,184,199,208] |
|                       | 2    | 7.04                  | 45.65 | 2-hexenal                          | Aldehyde         | floral, herbal                | 856                         | 861             | [153,180,184]         |
|                       | 3    | 7.78                  | 47.68 | octanal                            | Aldehyde         | green, citrusy, lemon         | 976                         | 1001            | [208,237,238]         |
|                       | 4    | 11.58                 | 0.06  | <i>n</i> -caproic acid vinyl ester | Ester            | not found                     | 979                         | 964             | [205]                 |
|                       | 5    | 13.81                 | 0.10  | benzeneacetaldehyde                | Aldehyde         | fresh, floral                 | 1044                        | 1043            | [232,239]             |
|                       | 6    | 15.57                 | 0.10  | 1-nonen-4-ol                       | Alcohol          | cardboard                     | 1096                        | 1094            | [226,240]             |
|                       | 7    | 15.88                 | 0.10  | 2,6-dimethyl-cyclohexanol          | Alcohol          | earthy                        | 1106                        | 1108            | [218,219]             |

<sup>a</sup>Mean of the retention times in the chromatograms of the fresh halophyte species (n=2). <sup>b</sup>Described odor descriptions. <sup>c</sup>Mean calculated of the linear retention indexes. NF – Not found.

## References

153. Lin, L.; Zhuang, M.; Lei, F.; Yang, B.; Zhao, M. GC/MS analysis of volatiles obtained by headspace solid-phase microextraction and simultaneous–distillation extraction from *Rabdosia serra* (MAXIM.) HARA leaf and stem. *Food Chemistry* **2013**, *136* (2), 555–562.
154. Radulović, N.; Blagojević, P.; Palić, R. Comparative study of the leaf volatiles of *Arctostaphylos uva-ursi* (L.) Spreng. and *Vaccinium vitis-idaea* L. (Ericaceae). *Molecules* **2010**, *15*(9), 6168–6185.
155. Aparicio, R.; Morales, M.T. Characterization of Olive Ripeness by Green Aroma Compounds of Virgin Olive Oil. *J. Agric. Food Chem.* **1998**, *46*, 1116–1122.
156. Costa, R.; d'Acampora Zellner, B.; Crupi, M. L.; Fina, M. R. D.; Valentino, M. R.; Dugo, P.; Dugo, G.; Mondello, L. GC–MS, GC–O and enantio–GC investigation of the essential oil of *Tarchonanthus camphoratus* L. *Flavour and Fragrance Journal* **2008**, *23* (1), 40–48.
157. Jirovetz, L.; Smith, D.; Buchbauer, G. Aroma Compound Analysis of *Eruca sativa* (Brassicaceae) SPME Head-space Leaf Samples Using GC, GC–MS, and Olfactometry. *Journal of Agricultural and Food Chemistry* **2002**, *50* (16), 4643–4646.
158. Aliannis, N.; Kalpoutzakis, E.; Mitaku, S.; Chinou, I.B. Composition and antimicrobial activity of the essential oils of two *Origanum* species. *J. Agric. Food Chem.* **2001**, *49*, 4168–4170.
159. Hazzit, M.; Baaliouamer, A.; Faleiro, M. L.; Miguel, M. Graça. Composition of the essential oils of *Thymus* and *Origanum* species from Algeria and their antioxidant and antimicrobial activities. *Journal of Agricultural and Food Chemistry* **2006**, *54*(17), 6314–6321.
160. Stashenko, E.E.; Martínez, J.R.; Ruíz, C.A.; Arias, G.; Durán, C.; Salgar, W.; Cala, M. *Lippia origanoides* chemotype differentiation based on essential oil GC-MS and principal component analysis. *J. Sep. Sci.* **2010**, *33*, 93–103.
161. Karabagias, I.K.; Karabagias, V.K.; Riganakos, K.A. Physico-Chemical Parameters, Phenolic Profile, *In Vitro* Antioxidant Activity and Volatile Compounds of Ladastacho (*Lavandula stoechas*) from the Region of Saidona. *Antioxidants* **2019**, *8*, 80.
162. Gerretzen, J.; Buydens, L. M. C.; Tromp – van den Beukel, A. O.; Koussissi, E.; Brouwer, E. R.; Jansen, J. J.; Szymańska, E. A novel approach for analyzing gas chromatography-mass spectrometry/olfactometry data. *Chemometrics and Intelligent Laboratory Systems* **2015**, *146*, 290–296.
163. Nguir, A.; Besbes, M.; Ben Jannet, H.; Flamini, G.; harzallah-Skhiri, F.; Hamza, M. H. Chemical Composition, Antioxidant and Anti-acetylcholinesterase activities of Tunisian *Crithmum maritimum* L. Essential oils. *Mediterranean Journal of Chemistry* **2011**, *1*, 173–179.
164. Minh Tu, N. T.; Onishi, Y.; Choi, H.-S.; Kondo, Y.; Bassore, S. M.; Ukeda, H.; Sawamura, M. Characteristic Odor Components of *Citrus sphaerocarpa* Tanaka (Kabosu) Cold-Pressed Peel Oil. *Journal of Agricultural and Food Chemistry* **2002**, *50* (10), 2908–2913.
165. Vasta, V.; D'Alessandro, A. G.; Priolo, A.; Petrotos, K.; Martemucci, G. Volatile compound profile of ewe's milk and meat of their suckling lambs in relation to pasture vs. indoor feeding system. *Small Ruminant Research* **2012**, *105* (1), 16–21.
166. Yi, L.; Dong, N.; Liu, S.; Yi, Z.; Zhang, Y. Chemical features of *Pericarpium Citri Reticulatae* and *Pericarpium Citri Reticulatae Viride* revealed by GC–MS metabolomics analysis. *Food Chemistry* **2015**, *186*, 192–199.
-

- 
167. Pino, J.A.; Quijano, C.E. Estudo de compostos voláteis de ameixa (*prunus domestica* L. cv. horvin) e estimativa da sua contribuição ao aroma. *Cienc. Tecnol. Aliment.* **2012**, *32*, 76–83.
168. Figuéredo, G.; Chalchat, J.-C.; Petrovic, S.; Maksimovic, Z.; Gorunovic, M.; Boza, P.; Radic, J. Composition of Essential Oils of Flowers, Leaves, Stems and Rhizome of *Peucedanum officinale* L. (*Apiaceae*). *Journal of Essential Oil Research* **2009**, *21*(2), 123–126.
169. Pino, J. A.; Marbot, R.; Vázquez, C. Characterization of Volatiles in Strawberry Guava (*Psidium cattleianum* Sabine) Fruit. *Journal of Agricultural and Food Chemistry* **2001**, *49* (12), 5883–5887.
170. Wang, Y.; Finn, C.; Qian, M.C. Impact of growing environment on Chickasaw blackberry (*Rubus* L) aroma evaluated by gas chromatography olfactometry dilution analysis. *J. Agric. Food Chem.* **2005**, *53*, 3563–3571.
171. Flamini, G.; Tebano, M.; Cioni, P.L. Volatiles emission patterns of different plant organs and pollen of *Citrus limon*. *Anal. Chim. Acta* **2007**, *589*, 120–124.
172. Cai, X.; Mai, R.-Z.; Zou, J.-J.; Zhang, H.-Y.; Zeng, X.-L.; Zheng, R.-R.; Wang, C.-Y. Analysis of aroma-active compounds in three sweet osmanthus (*Osmanthus fragrans*) cultivars by GC-olfactometry and GC-MS. *Journal of Zhejiang University-Sci B* **2014**, *15* (7), 638–648.
173. Xie, J.; Sun, B.; Zheng, F.; Wang, S. Volatile flavor constituents in roasted pork of Mini-pig. *Food Chemistry* **2008**, *109* (3), 506–514.
174. Mustapha, M. B.; Zardi-Bergaoui, A.; Chaieb, I.; Flamini, G.; Ascrizzi, R.; Jannet, H. B. Chemical Composition and Insecticidal Activity of *Crithmum Maritimum* L. Essential Oil against Stored-Product Beetle *Tribolium Castaneum*. *Chemistry & Biodiversity* **2020**, *17* (3), e1900552.
175. Flamini, G.; Cioni, P. L.; Morelli, I. Differences in the Fragrances of Pollen and Different Floral Parts of Male and Female Flowers of *Laurus nobilis*. *Journal of Agricultural and Food Chemistry* **2002**, *50* (16), 4647–4652.
176. Hudaib, M.; Speroni, E.; Di Pietra, A. M.; Cavrini, V. GC/MS evaluation of thyme (*Thymus vulgaris* L.) oil composition and variations during the vegetative cycle. *Journal of Pharmaceutical and Biomedical Analysis* **2002**, *29* (4), 691–700.
177. Schreiner, L.; Bauer, J.; Ortner, E.; Buettner, A. Structure–Odor Activity Studies on Derivatives of Aromatic and Oxygenated Monoterpenoids Synthesized by Modifying *p*-Cymene. *Journal of Natural Products* **2020**, *83* (4), 834–842.
178. Laokuldilok, N.; Utama-ang, N.; Kopermsub, P.; Thakeow, P. Characterization of Odor Active Compounds of Fresh and Dried Turmeric by Gas Chromatography-Mass Spectrometry, Gas Chromatography Olfactometry and Sensory Evaluation. *FAB J* **2017**, *3*, 216–230.
179. Stoppacher, N.; Kluger, B.; Zeilinger, S.; Krska, R.; Schuhmacher, R. Identification and profiling of volatile metabolites of the biocontrol fungus *Trichoderma atroviride* by HS-SPME-GC-MS. *J Microbiol Methods* **2010**, *81*(2), 187–193.
180. Sampaio, T.S.; Nogueira, P.C.L. Volatile components of mangaba fruit (*Hancornia speciosa* Gomes) at three stages of maturity. *Food Chem.* **2006**, *95*, 606–610.
181. Quijano, C.E.; Linares, D.; Pino, J.A. Changes in volatile compounds of fermented cereza agria [*Phyllanthus acidus* (L.) Skeels] fruit. *Flavour Fragr. J.* **2007**, *22*, 392–394.

- 
182. Lykomitros, D.; Fogliano, V.; Capuano, E. Flavor of roasted peanuts (*Arachis hypogaea*) — Part II: Correlation of volatile compounds to sensory characteristics. *Food Research International* **2016**, *89*, 870–881.
183. Telci, I.; Demirtas, I.; Sahin, A. Variation in plant properties and essential oil composition of sweet fennel (*Foeniculum vulgare* Mill.) fruits during stages of maturity. *Industrial Crops and Products* **2009**, *30* (1), 126–130.
184. Jordán, M. J.; Tandon, K.; Shaw, P. E.; Goodner, K. L., Aromatic Profile of Aqueous Banana Essence and Banana Fruit by Gas Chromatography–Mass Spectrometry (GC-MS) and Gas Chromatography–Olfactometry (GC-O). *Journal of Agricultural and Food Chemistry* **2001**, *49* (10), 4813–4817.
185. Gürbüz, O.; Rouseff, J. M.; Rouseff, R. L., Comparison of Aroma Volatiles in Commercial Merlot and Cabernet Sauvignon Wines Using Gas Chromatography–Olfactometry and Gas Chromatography–Mass Spectrometry. *Journal of Agricultural and Food Chemistry* **2006**, *54* (11), 3990–3996.
186. Cardeal, Z.L., Gomes da Silva, M.D., Marriott, P.J. Comprehensive two-dimensional gas chromatography/mass spectrometric analysis of pepper volatiles. *Rapid Commun Mass Spectrom.* **2006**, *20*(19), 2823–2836.
187. Beaulieu, J. C.; Grimm, C. C. Identification of Volatile Compounds in Cantaloupe at Various Developmental Stages Using Solid Phase Microextraction. *Journal of Agricultural and Food Chemistry* **2001**, *49* (3), 1345–1352.
188. Varlet, V.; Knockaert, C.; Prost, C.; Serot, T. Comparison of Odor-Active Volatile Compounds of Fresh and Smoked Salmon. *Journal of Agricultural and Food Chemistry* **2006**, *54* (9), 3391–3401.
189. Purcaro, G.; Tranchida, P.Q.; Jacques, R.A.; Caramão, E.B.; Moret, S.; Conte, L.; Dugo, P.; Dugo, G.; Mondello, L. Characterization of the yerba mate (*Ilex paraguariensis*) volatile fraction using solid-phase microextraction-comprehensive 2-D GC-MS. *J. Sep. Science* **2009**, *32*, 3755–3763.
190. Jirovetz, L.; Buchbauer, G.; Denkova, Z.; Slavchev, A.; Stoyanova, A.; Schmidt, E. Chemical composition, antimicrobial activities and odor descriptions of various *Salvia* sp. and *Thuja* sp. essential oils. *Ernährung/nutrition* **2006**, *30*, 152–159.
191. Nezhadali, A.; Shirvan, B.Z. Separation, Identification and Determination of Volatile Compounds of *Ziziphora persica* Bunge Using HS-SPME/GC-MS. *International Journal of Environmental Science and Development* **2010**, *1*(2), 115–118.
192. Niu, Y.; Wang, P.; Xiao, Q.; Xiao, Z.; Mao, H.; Zhang, J. Characterization of Odor-Active Volatiles and Odor Contribution Based on Binary Interaction Effects in Mango and Vodka Cocktail. *Molecules* **2020**, *25*, 1083.
193. Jeribi, C.; Karoui, I. J.; Benhassine, D.; Abderrabba, M. Chemical Composition of *Cardopatum corymbosum* Leaves Essential Oil. *Journal of Essential Oil Bearing Plants* **2016**, *19* (6), 1471–1477.
194. Villa-Ruano, N.; Pacheco-Hernández, Y.; Cruz-Durán, R.; Lozoya-Gloria, E. Volatiles and seasonal variation of the essential oil composition from the leaves of *Clinopodium macrostemum* var. *laevigatum* and its biological activities. *Industrial Crops and Products* **2015**, *77*, 741–747.
195. Mockute, D.; Bernotiene, G. The Main Citral–Geraniol and Carvacrol Chemotypes of the Essential Oil of *Thymus pulegioides* L. Growing Wild in Vilnius District (Lithuania). *Journal of Agricultural and Food Chemistry* **1999**, *47* (9), 3787–3790.

- 
196. Moon, S.-Y.; Cliff, M. A.; Li-Chan, E. C. Y. Odour-active components of simulated beef flavour analysed by solid phase microextraction and gas chromatography–mass spectrometry and –olfactometry. *Food Research International* **2006**, *39* (3), 294–308.
197. Giorgi, A.; Panseri, S.; Nanayakkara, N.N.MC.; Chiesa, L. HS-SPME-GC/MS analysis of the volatile compounds of *Achillea collina*: Evaluation of the emissions fingerprint induced by *Myzus persicae* infestation. *J. Plant Biol.* **2012**, *55*, 251–260.
198. Kokoska, L.; Urbanova, K.; Kloucek, P.; Nedorostova, L.; Polesna, L.; Malik, J.; Jiros, P.; Havlik, J.; Vadlejch, J. and Valterova, I. Essential Oils in the *Ranunculaceae* Family: Chemical Composition of Hydrodistilled Oils from *Consolida regalis*, *Delphinium elatum*, *Nigella hispanica*, and *N. nigellastrum* Seeds. *Chemistry & Biodiversity* **2012**, *9*, 151–161.
199. Cho, I. H.; Lee, S. Min; Kim, S. Y.; Choi, H.; Kim, K.-O.; Kim, Y.-S. (2007). Differentiation of aroma characteristics of pine-mushrooms (*Tricholoma matsutake* Sing.) of different grades using gas chromatography–olfactometry and sensory analysis. *Journal of Agricultural and Food Chemistry* **2007**, *55*(6), 2323–2328.
200. Gong, W.-c.; Chen, G.; Liu, C.-q.; Dunn, B. L.; Sun, W.-b. Comparison of floral scent between and within *Buddleja fallowiana* and *Buddleja officinalis* (*Scrophulariaceae*). *Biochemical Systematics and Ecology* **2014**, *55*, 322–328.
201. Ma, R.; Liu, X.; Tian, H.; Han, B.; Li, Y.; Tang, C.; Zhu, K.; Li, C.; Meng, Y. Odor-active volatile compounds profile of triploid rainbow trout with different marketable sizes. *Aquaculture Reports* **2020**, *17*, 100312.
202. Wang, P.; Ma, X.; Wang, W.; Xu, D.; Zhang, X.; Zhang, J.; Sun, Y. Characterization of flavor fingerprinting of red sufu during fermentation and the comparison of volatiles of typical products. *Food Science and Human Wellness* **2019**, *8* (4), 375–384.
203. Tontul, I.; Torun, M.; Dincer, C.; Sahin-Nadeem, H.; Topuz, A.; Turna, T.; Ozdemir, F. Comparative study on volatile compounds in Turkish green tea powder: Impact of tea clone, shading level and shooting period. *Food Research International* **2013**, *53* (2), 744–750.
204. Villberg, K.; Veijanen, A.; Gustafsson, I.; Wickström, K. Analysis of odour and taste problems in high-density polyethene. *Journal of Chromatography A* **1997**, *791* (1), 213–219.
205. Guo, X.; Ho, C.-T.; Wan, X.; Zhu, H.; Liu, Q.; Wen, Z. Changes of volatile compounds and odor profiles in Wuyi rock tea during processing. *Food Chemistry* **2021**, *341*, 128230.
206. Villa, C.; Trucchi, B.; Bertoli, A.; Pistelli, L.; Parodi, A.; Bassi, A. M.; Ruffoni, B. *Salvia somalensis* essential oil as a potential cosmetic ingredient: solvent-free microwave extraction, hydrodistillation, GC–MS analysis, odour evaluation and *in vitro* cytotoxicity assays. *International Journal of Cosmetic Science* **2009**, *31* (1), 55–61.
207. Liu, J.; Tang, X.; Zhang, Y.; Zhao, W. Determination of the Volatile Composition in Brown Millet, Milled Millet and Millet Bran by Gas Chromatography/Mass Spectrometry. *Molecules* **2012**, *17*, 2271–2282.
208. Zhu, J.; Chen, F.; Wang, L.; Niu, Y.; Yu, D.; Shu, C.; Chen, H.; Wang, H.; Xiao, Z. Comparison of Aroma-Active Volatiles in Oolong Tea Infusions Using GC–Olfactometry, GC–FPD, and GC–MS. *Journal of Agricultural and Food Chemistry* **2015**, *63* (34), 7499–7510.

- 
209. Huang, X.-H.; Zheng, X.; Chen, Z.-H.; Zhang, Y.-Y.; Du, M.; Dong, X.-P.; Qin, L.; Zhu, B.-W. Fresh and grilled eel volatile fingerprinting by e-Nose, GC-O, GC-MS and GC  $\times$  GC-QTOF combined with purge and trap and solvent-assisted flavor evaporation. *Food Research International* **2019**, *115*, 32-43.
210. Angioni, A.; Barra, A.; Coroneo, V.; Dessi, S.; Cabras, P. Chemical composition, seasonal variability, and antifungal activity of *Lavandula stoechas* L. ssp. *stoechas* Essential Oils from Stem/Leaves and Flowers. *J. Agric. Food Chem.* **2006**, *54*(12), 4364–4370.
211. Lu, Q.; Liu, F.; Bao, J. Volatile components of American silver carp analyzed by electronic nose and MMSE-GC-MS-O. *Journal of Food Biochemistry* **2019**, *43* (11), e13006.
212. Kishimoto, N.; Kashiwagi, A. Prediction of Specific Odor Markers in Oil from Olive Fruit Infested with Olive Scale Using an Electronic Nose. *IEEE International Symposium on Olfaction and Electronic Nose (ISOEN)* **2019**, Fukuoka, Japan, 1-3.
213. Kiatbenjakul, P.; Intarapichet, K.-O.; Cadwallader, K. R. Characterization of potent odorants in male giant water bug (*Lethocerus indicus* Lep. and Serv.), an important edible insect of Southeast Asia. *Food Chemistry* **2015**, *168*, 639-647.
214. Mahattanatawee, K.; Luanphaisarnnont, T.; Rouseff, R. Comparison of Aroma Character Impact Volatiles of Thummong Leaves (*Litsea petiolata* Hook. f.), Mangdana Water Beetle (*Lethocerus indicus*), and a Commercial Product as Flavoring Agents in Thai Traditional Cooking. *Journal of Agricultural and Food Chemistry* **2018**, *66* (10), 2480-2484.
215. Pino, J. A.; Mesa, J.; Muñoz, Y.; Martí, M. P.; Marbot, R. Volatile Components from Mango (*Mangifera indica* L.) Cultivars. *J. Agric. Food Chem.* **2005**, *53*, 2213–2223.
216. Nóbrega, I. C. C.; Ataíde, C. S.; Moura, O. M.; Livera, A. V.; Menezes, P. H. Volatile constituents of cooked bullfrog (*Rana catesbeiana*) legs. *Food Chemistry* **2007**, *102* (1), 186-191.
217. Cuevas, F. J.; Moreno-Rojas, J. M.; Ruiz-Moreno, M. J. Assessing a traceability technique in fresh oranges (*Citrus sinensis* L. Osbeck) with an HS-SPME-GC-MS method. Towards a volatile characterisation of organic oranges. *Food Chemistry* **2017**, *221*, 1930-1938.
218. Baião, L. F.; Oliveira, A. S.; Gonçalves, A.; Guedes de Pinho, P.; Valente, L. M. P.; Cunha, L. M. Analysis of volatile compounds in *Paracentrotus lividus* by HS-SPME/GS-MS and relation to its sensorial properties. *LWT* **2020**, *130*, 109629.
219. Bianchi, G.; Falcinelli, B.; Tosti, G.; Bocci, L.; Benincasa, P. Taste quality traits and volatile profiles of sprouts and wheatgrass from hulled and non-hulled *Triticum* species. *Journal of Food Biochemistry* **2019**, *43* (7), e12869.
220. Yang, D. S.; Shewfelt, R. L.; Lee, K.-S.; Kays, S. J. Comparison of Odor-Active Compounds from Six Distinctly Different Rice Flavor Types. *Journal of Agricultural and Food Chemistry* **2008**, *56* (8), 2780-2787.
221. Cai, L.; Ao, Z.; Tang, T.; Tong, F.; Wei, Z.; Yang, F.; Shu, Y.; Liu, S.; Mai, K. Characterization of difference in muscle volatile compounds between triploid and diploid crucian carp. *Aquaculture Reports* **2021**, *20*, 100641.
222. Zhang, K.; Lin, T. F.; Zhang, T.; Li, C.; Gao, N. Characterization of typical taste and odor compounds formed by *Microcystis aeruginosa*. *Journal of Environmental Sciences* **2013**, *25* (8), 1539-1548.

- 
223. Li, Q.; Shi, X.; Zhao, Q.; Cui, Y.; Ouyang, J.; Xu, F. Effect of cooking methods on nutritional quality and volatile compounds of Chinese chestnut (*Castanea mollissima* Blume). *Food Chemistry* **2016**, *201*, 80-86.
224. Yang, C.; Wang, Y.; Liang, Z.; Fan, P.; Wu, B.; Yang, L.; Wang, Y.; Li, S. Volatiles of grape berries evaluated at the germplasm level by headspace-SPME with GC-MS. *Food Chemistry* **2009**, *114* (3), 1106-1114.
225. Chen, J. L.; Wu, J. H.; Wang, Q.; Deng, H.; Hu, X. S. Changes in the Volatile Compounds and Chemical and Physical Properties of Kuerle Fragrant Pear (*Pyrus serotina* Reld) during Storage. *Journal of Agricultural and Food Chemistry* **2006**, *54* (23), 8842-8847.
226. Radulović, N.; Stojanović, G.; Milovanovic, V.; Dokovic, D.; Randjelovic, V. Volatile constituents of *Equisetum fluviatile* L. *Journal of Essential Oil Research* **2008**, *20*, 437-441.
227. Velasco-Negueruela, A.; Pérez-Alonso, M. J.; de Paz, P. L. P.; Palá-Paúl, J.; Sanz, J. Analysis by gas chromatography-mass spectrometry of the essential oils from the aerial parts of *Pimpinella anagadendron* Bolle and *Pimpinella rupicola* Svent., two endemic species to the Canary Islands, Spain. *Journal of Chromatography A* **2005**, *1095* (1), 180-184.
228. García-Aguilar, L.; Rojas-Molina, A.; Ibarra-Alvarado, C.; Rojas-Molina, J.I.; Vázquez-Landaverde, P.A.; Luna-Vázquez, F.J.; Zavala-Sánchez, M.A. Nutritional Value and Volatile Compounds of Black Cherry (*Prunus serotina*) Seeds. *Molecules* **2015**, *20*, 3479-3495.
229. Costa, R.; Tedone, L.; De Grazia, S.; Dugo, P.; Mondello, L. Multiple headspace-solid-phase microextraction: An application to quantification of mushroom volatiles. *Analytica Chimica Acta* **2013**, *770*, 1-6.
230. Pino, J. A.; Trujillo, R. Characterization of odour-active compounds of sour guava (*Psidium acidum*[DC.]Landrum) fruit by gas chromatography-olfactometry and odour activity value. *Flavour and Fragrance Journal* **2021**, *36* (2), 207-212.
231. Ali, S. B.; Ghatak, B.; Gupta, S. D.; Debabhuti, N.; Chakraborty, P.; Sharma, P.; Ghosh, A.; Tudu, B.; Mitra, S.; Sarkar, M. P.; Bhattacharyya, N.; Bandyopadhyay, R. Detection of 3-Carene in mango using a quartz crystal microbalance sensor. *Sensors and Actuators B: Chemical* **2016**, *230*, 791-800.
232. Selli, S.; Cayhan, G. G. Analysis of volatile compounds of wild gilthead sea bream (*Sparus aurata*) by simultaneous distillation-extraction (SDE) and GC-MS. *Microchemical Journal* **2009**, *93* (2), 232-235.
233. Villière, A.; Arvisenet, G.; Lethuaut, L.; Prost, C.; Sérot, T. Selection of a representative extraction method for the analysis of odourant volatile composition of French cider by GC-MS-O and GC×GC-TOF-MS. *Food Chemistry* **2012**, *131* (4), 1561-1568.
234. Shen, X.; Chen, W.; Zheng, Y.; Lei, X.; Tang, M.; Wang, H.; Song, F. Chemical composition, antibacterial and antioxidant activities of hydrosols from different parts of *Areca catechu* L. and *Cocos nucifera* L. *Industrial Crops and Products* **2017**, *96*, 110-119.
235. Dussort, P.; Deprêtre, N.; Bou-Maroun, E.; Fant, C.; Guichard, E.; Brunerie, P.; Le Fur, Y.; Le Quéré, J. L. An original approach for gas chromatography-olfactometry detection frequency analysis: Application to gin. *Food Research International* **2012**, *49* (1), 253-262.

- 
- 236.Miranda, R. F.; de Paula, M. M.; da Costa, G. M.; Barão, C. E.; da Silva, A. C. R.; Raices, R. S. L.; Gomes, R. G.; Pimentel, T. C. Orange juice added with *L. casei*: is there an impact of the probiotic addition methodology on the quality parameters? *LWT* **2019**, *106*, 186-193.
- 237.Amanpour, A.; Kelebek, H.; Kesen, S.; Selli, S. Characterization of Aroma-Active Compounds in Iranian cv. Mari Olive Oil by Aroma Extract Dilution Analysis and GC–MS-Olfactometry. *Journal of the American Oil Chemists' Society* **2016**, *93* (12), 1595-1603.
- 238.Evstatieva, L.; Todorova, M.; Antonova, D.; Staneva J. Chemical composition of the essential oils of *Rhodiola rosea* L. of three different origins. *Pharmacogn Mag.* **2010**, *6*(24), 256-258.
- 239.Fu, M.; Shen, X.; Peng, H.; Zhou, Q.; Yun, J.; Sun, Y.; Ho, C.-T.; Cai, H.; Hou, R. Identification of rancidity markers in roasted sunflower seeds produced from raw materials stored for different periods of time. *LWT* **2020**, *118*, 108721.
- 240.Matsuishi, M.; Kume, J.; Itou, Y.; Takahashi, M.; Arai, M.; Nagatomi, H.; Watanabe, K.; Hayase, F.; Okitani, A. Aroma components of Wagyu beef and imported beef. *Nihon Chikusan Gakkaiho* **2004**, *75* (3), 409-415.
